# Supplementary material for: Cosmogenic 3 He paleothermometry on post-LGM glacial bedrock within the central European Alps
Source: Copernicus journal article supplement (doi:10.5194/gchron-2022-1), 2022-02-09
Supplement: Supplementary file [file gchron-2022-1-AC2-supplement.pdf]

Comment on gchron-2022-1

Gribenski et al. (2022)  
Geochronology Review

Referee #2 (Samuel Niedermann)

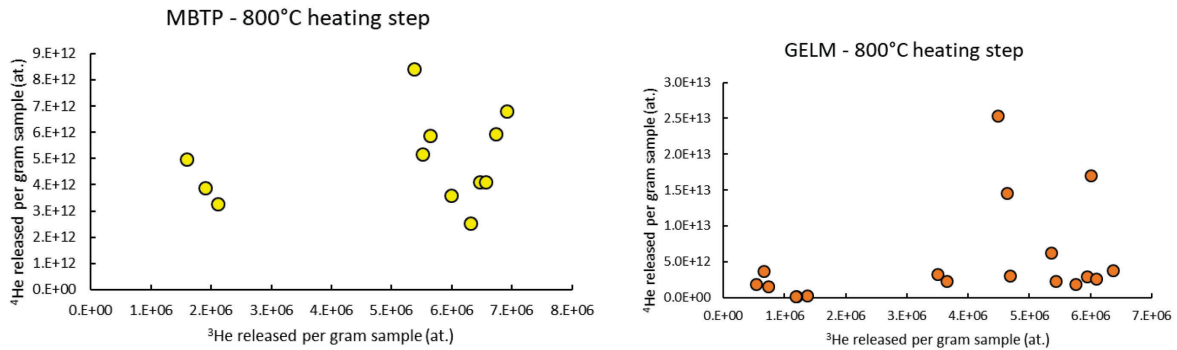

Figure RN1: Amounts of  $^3\text{He}$  and  $^4\text{He}$  released in the 800°C heating steps in samples from the MBTP (left) and the GELM (right) transects

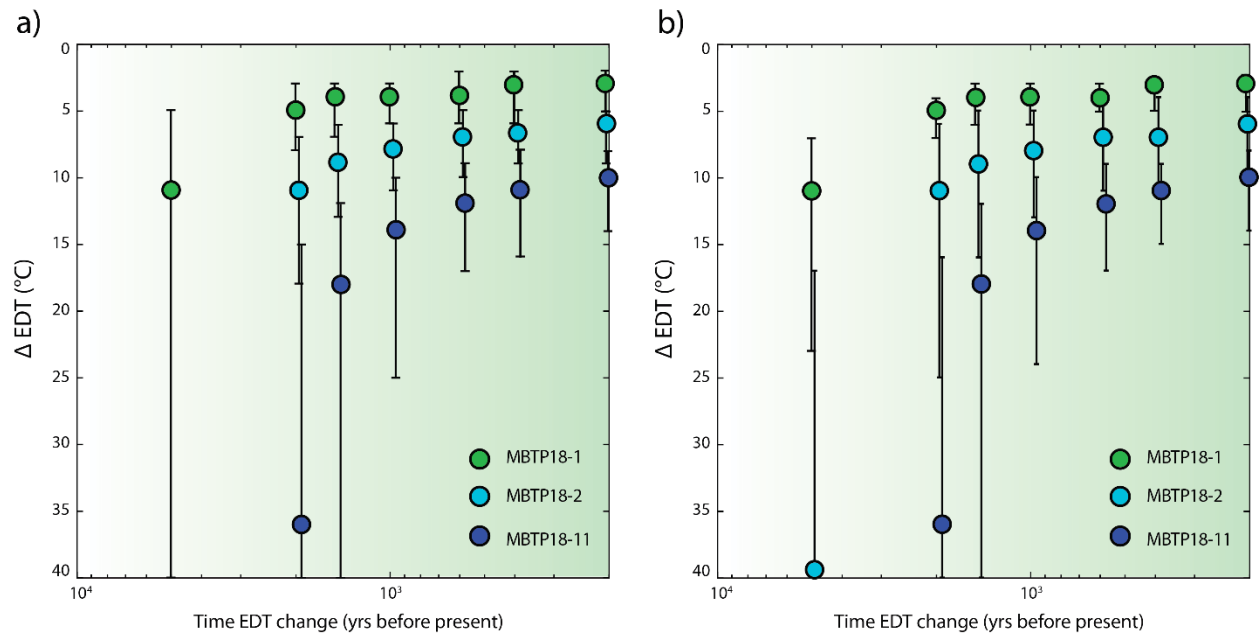

Figure RN2: Solutions of time-EDT scenario explaining our observed  $^3\text{He}$  concentrations for the MBTP samples obtained using  $^3\text{He}$  errors either derived from the average error (left panel, as done in our study) or from the standard deviation (right panel)
